# Supplementary material
Source: MDPI journal article supplement (https://www.mdpi.com/2410-3888/8/9/456)
Supplement: s1 [file s1]

Quality of transcriptome sequencing and assembly of the gonads in *M. unguiculatus*

| Sample | Total Raw Reads (M) | Total Clean Reads (M) | Total Clean Bases(Gb) | Clean Reads Q20(%) | Clean Reads Q30(%) | Clean Reads Ratio (%) |
|--------|---------------------|-----------------------|-----------------------|--------------------|--------------------|-----------------------|
| CF1    | 45.44               | 42.47                 | 6.37                  | 96.75              | 90.87              | 93.46                 |
| CF2    | 47.19               | 43.45                 | 6.52                  | 96.78              | 90.97              | 92.09                 |
| CF3    | 47.19               | 43.42                 | 6.51                  | 97.12              | 91.76              | 92.02                 |
| CM1    | 45.44               | 43.05                 | 6.46                  | 96.66              | 90.65              | 94.74                 |
| CM2    | 45.44               | 42.76                 | 6.41                  | 96.76              | 90.9               | 94.1                  |
| CM3    | 45.44               | 42.9                  | 6.44                  | 97.05              | 91.62              | 94.42                 |
| EF1    | 45.44               | 42.79                 | 6.42                  | 96.73              | 90.82              | 94.17                 |
| EF2    | 45.44               | 43.05                 | 6.46                  | 96.62              | 90.55              | 94.75                 |
| EF3    | 45.44               | 42.83                 | 6.42                  | 96.56              | 90.41              | 94.27                 |
| EM1    | 45.44               | 42.9                  | 6.43                  | 96.96              | 91.4               | 94.41                 |
| EM2    | 45.44               | 43.03                 | 6.46                  | 96.81              | 91.06              | 94.71                 |
| EM3    | 47.19               | 43.23                 | 6.48                  | 97.59              | 92.9               | 91.61                 |
